# Supplementary material for: Exploring the drivers of tropospheric hydroxyl radical trends in the Geophysical Fluid Dynamics Laboratory AM4.1 atmospheric chemistry–climate model
Source: Copernicus journal article supplement (doi:10.5194/acp-23-4955-2023), 2023-04-28
Supplement: Supplementary file 1 [file acp-23-4955-2023-supplement.pdf]

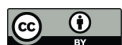

*Supplement of*

## **Exploring the drivers of tropospheric hydroxyl radical trends in the Geophysical Fluid Dynamics Laboratory AM4.1 atmospheric chemistry–climate model**

**Glen Chua et al.**

*Correspondence to:* Glen Chua (gchua@princeton.edu)

The copyright of individual parts of the supplement might differ from the article licence.

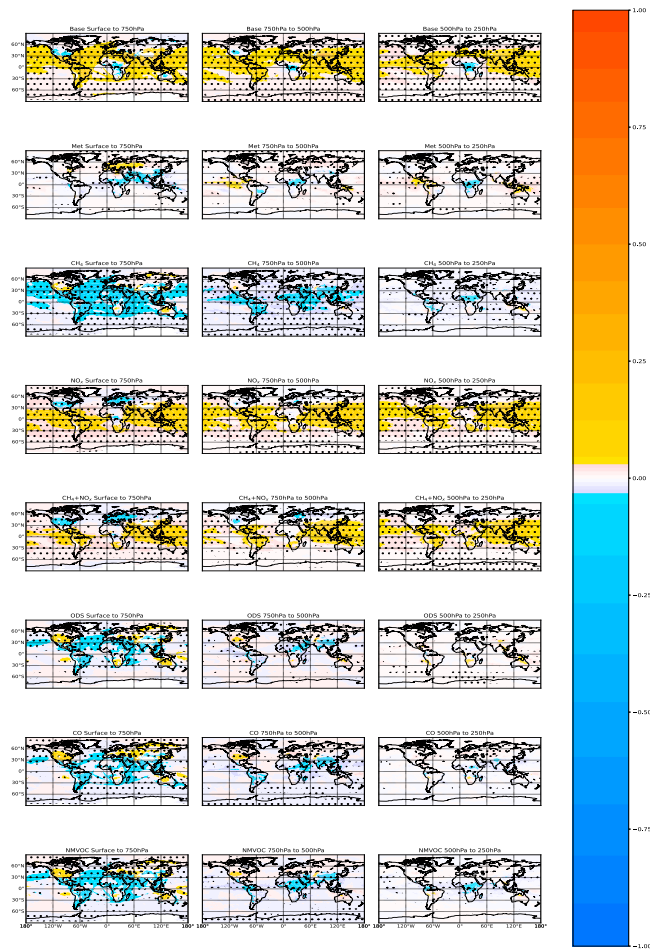

Supplementary Figure 1: Spatial airmass-weighted tropospheric [OH] trends at different pressure levels for the different runs. Trends are calculated using the Theil-Sen method. Stipples show areas where a significant trend is detected at the 95 % level using the Mann-Kendall test.

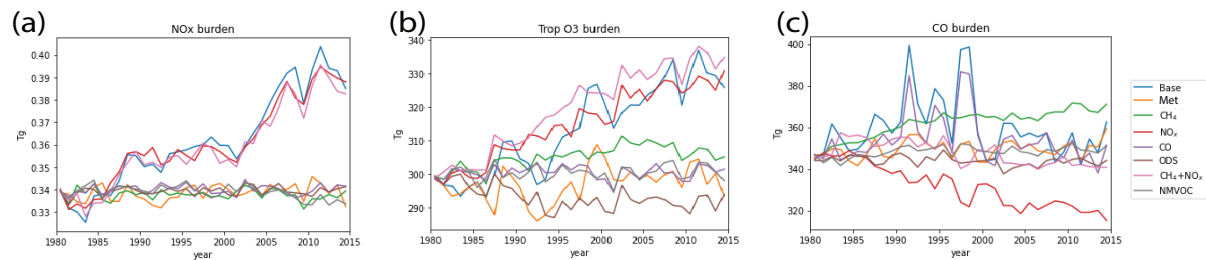

Supplementary Figure 2: (a) Tropospheric O<sub>3</sub>, (b) NO<sub>x</sub> and (c) CO burdens for the different model runs.
